# Supplementary material for: Influence of Rare Earth Oxide Concentration on Electrochemical Co-Deposition of Nd and Pr from NdF3-PrF3-LiF Based Melts
Source: MDPI journal article supplement (doi:10.3390/met12071204), 2022-07-15
Supplement: s1 [file s1]

*Supplementary Materials*

# **Influence of Rare Earth Oxide Concentration on Electrochemical Co-deposition of Nd and Pr from NdF<sub>3</sub>-PrF<sub>3</sub>-LiF Based Melts**

**Vesna S. Cvetković <sup>1,\*</sup>, Dominic Feldhaus <sup>2</sup>, Nataša M. Vukićević <sup>1</sup>, Ksenija Milicevic-Neumann <sup>2</sup>, Tanja S. Barudžija <sup>3</sup>, Bernd Friedrich <sup>2</sup> and Jovan N. Jovićević <sup>1</sup>**

<sup>1</sup> Department of Electrochemistry, Institute of Chemistry, Technology and Metallurgy, National Institute of the Republic of Serbia, University of Belgrade, 11000 Belgrade, Serbia; vukicevic@ihtm.bg.ac.rs (N.M.V.); jovicevic@ihtm.bg.ac.rs (J.N.J.)

<sup>2</sup> IME Process Metallurgy and Metal Recycling, Institute of RWTH Aachen University, 52056 Aachen, Germany; dfeldhaus@metallurgie.rwth-aachen.de (D.F.); kmneumann@metallurgie.rwth-aachen.de (K.M.-N.); bfriedrich@metallurgie.rwth-aachen.de (B.F.)

<sup>3</sup> Institute for Nuclear Sciences Vinča, University of Belgrade, 11001 Belgrade, Serbia; tbarudzija@vin.bg.ac.rs

\* Correspondence: v.cvetkovic@ihtm.bg.ac.rs

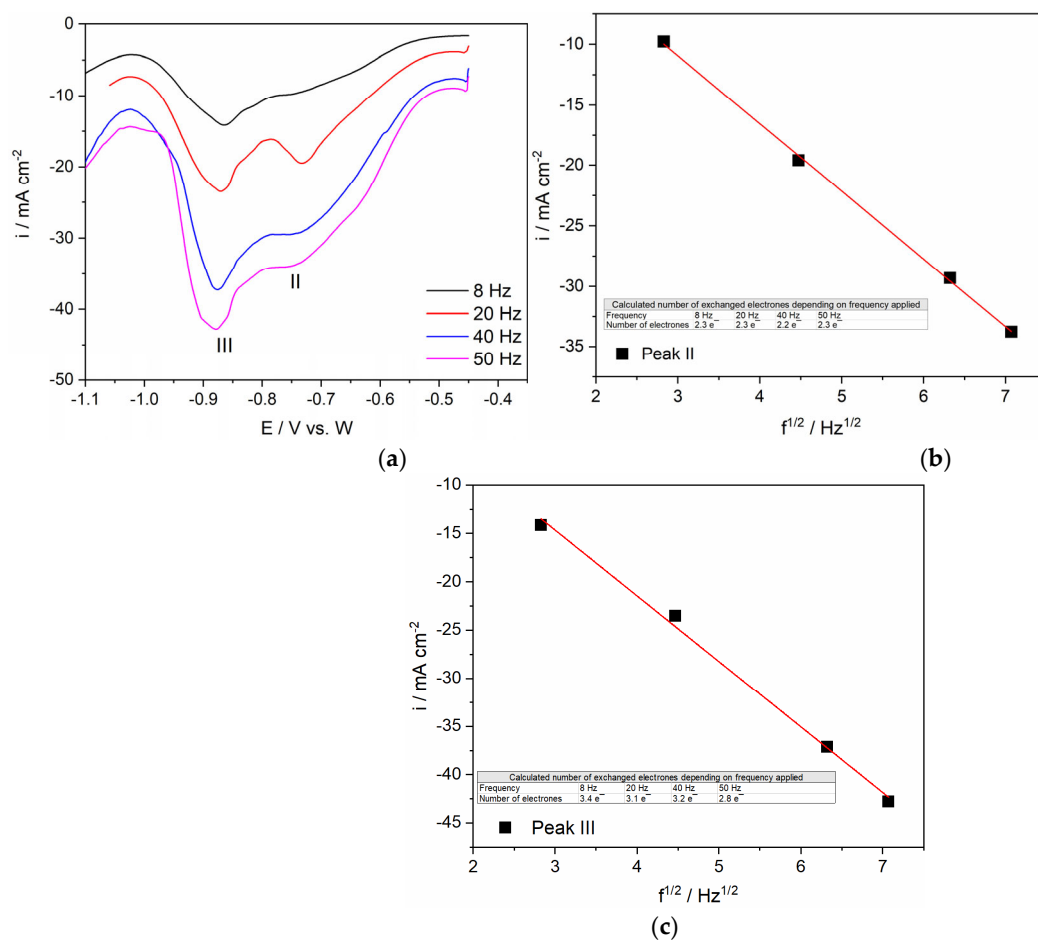

**Figure S1.** (a) SWVs obtained with different frequencies on W working electrode: pulse height: 25 mV; potential step: 1 mV; Variation of the peak current density vs. the square root of the frequency for: (b) Peak II; (c) Peak III. Electron transfer numbers were calculated based on the half-peak width recorded by SWV (embedded in the picture).
